# Supplementary material for: Mental Fatigue Might Be Not So Bad for Exercise Performance After All: A Systematic Review and Bias-Sensitive Meta-Analysis
Source: PubMed Central journal article supplement (PMC7546119; doi:10.5334/joc.126), 2020-10-09
Supplement: joc-3-1-126-s1.pdf [file joc-3-1-126-s1.pdf]

Table 1. Studies examining the effects of mental fatigue on exercise performance. Studies not included in quantitative meta-analysis are marked with \*. TTE: Time to exhaustion test; TT: Time-trial; MVC: Maximal voluntary contraction; LSPT: Loughborough soccer passing test.

| Reference                    | Participants | N  | Experimental task         | Control task         | Type of exercise | Test                    | Measure      | ↓Performance | ↑RPE | Mental fatigue |
|------------------------------|--------------|----|---------------------------|----------------------|------------------|-------------------------|--------------|--------------|------|----------------|
| Marcora et al. (2009)        | Recreational | 18 | 90min-AX-CPT              | 90min-documentary    | Externally-paced | Cycling TTE 80%         | Time         | Yes          | Yes  | Yes            |
| Brownsberger et al. (2013) * | Recreational | 12 | 90min-AX-CPT              | 90min-documentary    | Self-paced       | Cycling TT-10min RPE 15 | Power output | Yes          | -    | Yes            |
| Pageaux et al. (2013)        | Recreational | 8  | 90min-AX-CPT              | 90min-documentary    | Strength         | TTE MVC                 | Time         | Yes          | Yes  | Yes            |
| MacMahon et al. (2014)       | Well-trained | 16 | 90min-AX-CPT              | 90min-documentary    | Self-paced       | Running TT-3km          | Time         | Yes          | No   | No             |
| Pageaux et al. (2014)        | Recreational | 20 | 30min-Stroop              | 30min-Stroop-control | Self-paced       | Running TT-5km          | Time         | Yes          | Yes  | No             |
| Duncan et al. (2015)         | Well-trained | 8  | 40min-Sustained Attention | 40min-documentary    | Maximal Effort   | Cycling 30seg Wingate   | Power output | No           | No   | Na             |
| Martin et al. (2015)         | Well-trained | 16 | 90min-AX-CPT              | 90min-documentary    | Maximal Effort   | Cycling 3min all-out    | Power output | No           | No   | No             |

|                                 |                     |           |                      |                          |                         |                                       |                     |            |            |            |
|---------------------------------|---------------------|-----------|----------------------|--------------------------|-------------------------|---------------------------------------|---------------------|------------|------------|------------|
| <b>Smith et al. (2015)</b>      | <b>Well-trained</b> | <b>10</b> | <b>90min-AX-CPT</b>  | <b>90min-documentary</b> | <b>Self-paced</b>       | <b>Running TT-45min</b>               | <b>Distance</b>     | <b>Yes</b> | <b>Yes</b> | <b>Yes</b> |
| <b>Azevedo et al. (2016)</b>    | <b>Recreational</b> | <b>12</b> | <b>90min-AX-CPT</b>  | <b>90min-documentary</b> | <b>Externally-paced</b> | <b>Cycling TTE 80%</b>                | <b>Time</b>         | <b>No</b>  | <b>No</b>  | <b>No</b>  |
| <b>Badin et al. (2016)</b>      | <b>Elite</b>        | <b>12</b> | <b>30min-Stroop</b>  | <b>30min-documentary</b> | <b>Soccer Specific</b>  | <b>Small side game</b>                | <b>Distance</b>     | <b>No</b>  | <b>No</b>  | <b>No</b>  |
| <b>Head et al. (2016)</b>       | <b>Recreational</b> | <b>17</b> | <b>52min-Go/NoGo</b> | <b>52min-documentary</b> | <b>Strength</b>         | <b>20min Body resistance exercise</b> | <b>Repetitions</b>  | <b>Yes</b> | <b>-</b>   | <b>Yes</b> |
| <b>Martin et al. (2016)</b>     | <b>Elite</b>        | <b>11</b> | <b>30min-Stroop</b>  | <b>10 min seated</b>     | <b>Self-paced</b>       | <b>Cycling TT-20min</b>               | <b>Power output</b> | <b>No</b>  | <b>No</b>  | <b>No</b>  |
| <b>Martin et al. (2016)</b>     | <b>Recreational</b> | <b>9</b>  | <b>30min-Stroop</b>  | <b>10 min seated</b>     | <b>Self-paced</b>       | <b>Cycling TT-20min</b>               | <b>Power output</b> | <b>Yes</b> | <b>No</b>  | <b>Yes</b> |
| <b>Smith et al. Exp1 (2016)</b> | <b>Recreational</b> | <b>12</b> | <b>30min-Stroop</b>  | <b>30min-seated</b>      | <b>Externally-paced</b> | <b>Running (Yo-Yo test)</b>           | <b>Distance</b>     | <b>Yes</b> | <b>Yes</b> | <b>Yes</b> |
| <b>Smith et al. Exp2 (2016)</b> | <b>Well-trained</b> | <b>14</b> | <b>30min-Stroop</b>  | <b>30min-seated</b>      | <b>Soccer Specific</b>  | <b>LSPT</b>                           | <b>Time</b>         | <b>No</b>  | <b>-</b>   | <b>Yes</b> |

|                                   |                     |           |                                                                 |                               |                              |                                         |                            |            |            |            |
|-----------------------------------|---------------------|-----------|-----------------------------------------------------------------|-------------------------------|------------------------------|-----------------------------------------|----------------------------|------------|------------|------------|
| <b>Otani et al (2017)</b>         | <b>Recreational</b> | <b>20</b> | <b>90min Stroop/<br/>Sternberg/Rapid visual<br/>information</b> | <b>90min-<br/>documentary</b> | <b>Externally-<br/>paced</b> | <b>Cycling TTE<br/>80%</b>              | <b>Time</b>                | <b>Yes</b> | <b>No</b>  | <b>Yes</b> |
| <b>Van Cutsem et al. (2017) *</b> | <b>Well-trained</b> | <b>10</b> | <b>45min-Stroop</b>                                             | <b>45min<br/>Documentary</b>  | <b>Externally-<br/>paced</b> | <b>Cycling TTE-<br/>15min 80%</b>       | <b>Time</b>                | <b>No</b>  | <b>No</b>  | <b>Yes</b> |
| <b>Veness et al. (2017)</b>       | <b>Elite</b>        | <b>10</b> | <b>30min-Stroop</b>                                             | <b>30min reading</b>          | <b>Externally-<br/>paced</b> | <b>Running (Yo-<br/>Yo test)</b>        | <b>Distance</b>            | <b>Yes</b> | <b>Yes</b> |            |
| <b>Vrijkotte et al. (2018) *</b>  | <b>Well-trained</b> | <b>9</b>  | <b>90min-Stroop</b>                                             | <b>90min-seated</b>           | <b>Externally-<br/>paced</b> | <b>Cycling<br/>Incremental<br/>test</b> | <b>Power<br/>output</b>    | <b>No</b>  | <b>No</b>  | <b>Yes</b> |
| <b>Brown et al. (2019)</b>        | <b>Recreational</b> | <b>25</b> | <b>50min-AX-CPT</b>                                             | <b>50min<br/>documentary</b>  | <b>Self-paced</b>            | <b>Cycling TT-<br/>30min</b>            | <b>Total work<br/>(Kj)</b> | <b>Yes</b> | <b>No</b>  | <b>Yes</b> |
| <b>Clark et al. (2019)</b>        | <b>Well-trained</b> | <b>10</b> | <b>30min-Stroop</b>                                             | <b>30 min<br/>documentary</b> | <b>Self-paced</b>            | <b>Cycling TT-<br/>6min</b>             | <b>Total work<br/>(Kj)</b> | <b>No</b>  | <b>-</b>   | <b>Na</b>  |
| <b>Clark et al. (2019)</b>        | <b>Recreational</b> | <b>10</b> | <b>30min-Stroop/n-back</b>                                      | <b>30 min<br/>documentary</b> | <b>Self-paced</b>            | <b>Cycling TT-<br/>6min</b>             | <b>Total work<br/>(Kj)</b> | <b>No</b>  | <b>.</b>   | <b>Na</b>  |
| <b>Filipas et al. (2018)</b>      | <b>Well-trained</b> | <b>8</b>  | <b>60min-Stroop</b>                                             | <b>60min-<br/>painting</b>    | <b>Self-paced</b>            | <b>Rowing TT-<br/>1500m</b>             | <b>Time</b>                | <b>No</b>  | <b>No</b>  | <b>Yes</b> |

|                                       |                     |           |                                                             |                             |                         |                               |                     |            |            |            |
|---------------------------------------|---------------------|-----------|-------------------------------------------------------------|-----------------------------|-------------------------|-------------------------------|---------------------|------------|------------|------------|
| <b>Penna et al. (2018)-a</b>          | <b>Well-trained</b> | <b>8</b>  | <b>30min-Stroop</b>                                         | <b>30min-documentary</b>    | <b>Self-paced</b>       | <b>Swimming TT-1500m</b>      | <b>Time</b>         | <b>Yes</b> | <b>No</b>  | <b>Yes</b> |
| <b>Penna et al. (2018)-b *</b>        | <b>Well-trained</b> | <b>12</b> | <b>30min-Stroop</b>                                         | <b>30min-documentary</b>    | <b>Externally-paced</b> | <b>Running Yo-Yo test</b>     | <b>Distance</b>     | <b>Yes</b> | <b>-</b>   | <b>Yes</b> |
| <b>Pires et al. (2018)</b>            | <b>Recreational</b> | <b>12</b> | <b>30min Rapid Visual Information Processing (RVP) Test</b> | <b>30min-seated</b>         | <b>Self-paced</b>       | <b>Cycling TT-20km</b>        | <b>Power output</b> | <b>Yes</b> | <b>Yes</b> | <b>Yes</b> |
| <b>Silva-Cavalcante et al. (2018)</b> | <b>Well-trained</b> | <b>8</b>  | <b>90min-AX-CPT</b>                                         | <b>90min-documentary</b>    | <b>Self-paced</b>       | <b>Cycling TT_4km</b>         | <b>Time</b>         | <b>No</b>  | <b>No</b>  | <b>Yes</b> |
| <b>Slimani et al. (2018) *</b>        | <b>Well-trained</b> | <b>10</b> | <b>30min-Stroop</b>                                         | <b>30min reading</b>        | <b>Externally-paced</b> | <b>Running (shuttle test)</b> | <b>Distance</b>     | <b>Yes</b> | <b>Yes</b> | <b>Yes</b> |
| <b>Staiano et al. (2018)]</b>         | <b>Elite</b>        | <b>13</b> | <b>60min-Stroop</b>                                         | <b>60min-documentary</b>    | <b>Self-paced</b>       | <b>Kayaking TT-2000m</b>      | <b>Time</b>         | <b>Yes</b> | <b>No</b>  | <b>Yes</b> |
| <b>Salam et al. (2018) *</b>          | <b>Well-trained</b> | <b>10</b> | <b>30min-Stroop</b>                                         | <b>30min-seated</b>         | <b>Externally-paced</b> | <b>Cycling TTE</b>            | <b>Time</b>         | <b>Na</b>  | <b>-</b>   | <b>Yes</b> |
| <b>MacMahon et al. (2019)</b>         | <b>Recreational</b> | <b>13</b> | <b>30min-Stroop</b>                                         | <b>30min-Stroop-control</b> | <b>Externally-paced</b> | <b>Running shuttle test</b>   | <b>Time</b>         | <b>Yes</b> | <b>No</b>  | <b>Yes</b> |

|                                  |                     |           |                     |                               |                              |                    |             |            |           |            |
|----------------------------------|---------------------|-----------|---------------------|-------------------------------|------------------------------|--------------------|-------------|------------|-----------|------------|
| <b>Holgado et al.<br/>(2020)</b> | <b>Recreational</b> | <b>30</b> | <b>90min-AX-CPT</b> | <b>90min-<br/>documentary</b> | <b>Externally-<br/>paced</b> | <b>Cycling TTE</b> | <b>Time</b> | <b>No</b>  | <b>No</b> | <b>Yes</b> |
| <b>Lopes et al.<br/>(2020)</b>   | <b>Elite</b>        | <b>31</b> | <b>45min Stroop</b> | <b>45min-<br/>documentary</b> | <b>Externally-<br/>paced</b> | <b>Running TTE</b> | <b>Time</b> | <b>Yes</b> | <b>No</b> | <b>Yes</b> |
